# Supplementary material for: Antimicrobial Resistance Profiles of Human Commensal Neisseria Species
Source: MDPI journal article supplement (doi:10.3390/antibiotics10050538), 2021-05-06
Supplement: s1 [file s1]

## Supplementary Materials:

**Table S1:** Antibiotic Disk Diffusion Assay (DDA) results for 4 commensal *Neisseria* species and 4 *N. gonorrhoeae* strains. Average ( $\pm$  SEM) diameter (mm) of the zones of inhibition from 3 biological replicates, of 3 independent experiments, were measured using ImageJ [2].

| ZoI (mm)                 | <i>Neisseria</i> species |                       |                       |                       |                              |                              |                             |                              |
|--------------------------|--------------------------|-----------------------|-----------------------|-----------------------|------------------------------|------------------------------|-----------------------------|------------------------------|
|                          | <i>Nla</i>               | <i>Nci</i>            | <i>Nmu</i>            | <i>Nel</i>            | <i>Ngo</i> FA19 <sup>a</sup> | <i>Ngo</i> MS11 <sup>b</sup> | <i>Ngo</i> F89 <sup>c</sup> | <i>Ngo</i> H041 <sup>d</sup> |
| Penicillin<br>-10 UI     | 32.5<br>( $\pm 0.3$ )    | 29.8<br>( $\pm 0.6$ ) | 34.0<br>( $\pm 0.3$ ) | 29.7<br>( $\pm 0.3$ ) | 46.7<br>( $\pm 1.0$ )        | 26.9<br>( $\pm 0.8$ )        | 31.6<br>( $\pm 0.3$ )       | 24.4<br>( $\pm 0.3$ )        |
| Ampicillin<br>-10ug      | 31.6<br>( $\pm 1.0$ )    | 28.3<br>( $\pm 0.3$ ) | 29.2<br>( $\pm 1.0$ ) | 29.5<br>( $\pm 0.4$ ) | 42.5<br>( $\pm 0.4$ )        | 30.5<br>( $\pm 0.1$ )        | 34.2<br>( $\pm 0.5$ )       | 24.8<br>( $\pm 0.3$ )        |
| Ceftriaxone<br>-30ug     | 41.2<br>( $\pm 0.8$ )    | 30.1<br>( $\pm 1.1$ ) | 37.4<br>( $\pm 0.2$ ) | 32.4<br>( $\pm 0.5$ ) | 50.2<br>( $\pm 0.6$ )        | 37.2<br>( $\pm 0.7$ )        | 31.5<br>( $\pm 0.4$ )       | 30.8<br>( $\pm 0.3$ )        |
| Azithromycin<br>-15ug    | 24.6<br>( $\pm 0.7$ )    | 15.5<br>( $\pm 0.3$ ) | 21.4<br>( $\pm 0.3$ ) | 20.9<br>( $\pm 0.2$ ) | 35.9<br>( $\pm 0.8$ )        | 31.5<br>( $\pm 0.4$ )        | 33.0<br>( $\pm 1.1$ )       | 34.2<br>( $\pm 0.3$ )        |
| Erythromycin<br>-15ug    | 21.4<br>( $\pm 0.4$ )    | 14.9<br>( $\pm 0.2$ ) | 15.9<br>( $\pm 0.4$ ) | 18.0<br>( $\pm 1.0$ ) | 33.1<br>( $\pm 0.7$ )        | 26.0<br>( $\pm 0.5$ )        | 26.2<br>( $\pm 1.0$ )       | 28.4<br>( $\pm 0.4$ )        |
| Chloramphenicol<br>-30ug | 35.1<br>( $\pm 1.2$ )    | 25.6<br>( $\pm 1.2$ ) | 27.3<br>( $\pm 0.4$ ) | 26.3<br>( $\pm 0.4$ ) | 42.2<br>( $\pm 0.5$ )        | 24.8<br>( $\pm 0.5$ )        | 29.7<br>( $\pm 0.6$ )       | 26.3<br>( $\pm 0.2$ )        |
| Kanamycin<br>-30ug       | 30.7<br>( $\pm 0.6$ )    | 21.5<br>( $\pm 0.1$ ) | 31.4<br>( $\pm 0.2$ ) | 23.1<br>( $\pm 0.3$ ) | 33.8<br>( $\pm 0.5$ )        | 27.8<br>( $\pm 0.6$ )        | 31.9<br>( $\pm 0.6$ )       | 32.2<br>( $\pm 0.3$ )        |
| Streptomycin<br>-10ug    | 18.7<br>( $\pm 0.3$ )    | 14.0<br>( $\pm 0.2$ ) | 19.7<br>( $\pm 0.4$ ) | 13.8<br>( $\pm 0.4$ ) | 16.9<br>( $\pm 0.5$ )        | 6.0<br>( $\pm 0.1$ )         | 15.2<br>( $\pm 0.4$ )       | 16.1<br>( $\pm 0.3$ )        |
| Tetracycline<br>-30ug    | 32.8<br>( $\pm 0.5$ )    | 25.6<br>( $\pm 0.4$ ) | 24.9<br>( $\pm 0.4$ ) | 25.3<br>( $\pm 0.2$ ) | 37.8<br>( $\pm 0.6$ )        | 28.0<br>( $\pm 0.4$ )        | 30.8<br>( $\pm 0.4$ )       | 29.7<br>( $\pm 0.3$ )        |
| Gentamicin<br>-10ug      | 19.9<br>( $\pm 0.3$ )    | 17.8<br>( $\pm 0.2$ ) | 21.8<br>( $\pm 0.3$ ) | 17.9<br>( $\pm 0.2$ ) | 20.2<br>( $\pm 0.2$ )        | 17.5<br>( $\pm 0.3$ )        | 18.2<br>( $\pm 0.4$ )       | 19.0<br>( $\pm 0.1$ )        |

Zones of inhibition (ZoI) of and similar (<20% diameter reduction) to *N. gonorrhoeae* FA19 are highlighted in grey. ZoI highlighted in pink are > 33% smaller than those of *N. gonorrhoeae* FA19, and denote high resistance levels. Intermediate species display ZoI smaller than those of *N. gonorrhoeae* FA19 by 20% to 33% and are highlighted in yellow. The antimicrobial disk measures 6 mm in diameter, which is the minimum ZoI measurable. Species: *Nla*, *N. lactamica*; *Nci*, *N. cinerea*; *Nmu*, *N. mucosa*; *Nel*, *N. elongata*; *Ngo*, *N. gonorrhoeae*

<sup>a</sup> *N. gonorrhoeae* FA19 is considered susceptible to most antibiotics presented, used as reference [3].

<sup>b</sup> *N. gonorrhoeae* MS11 is considered highly resistant to streptomycin [4].

<sup>c</sup> *N. gonorrhoeae* F89 is considered highly resistant to cefixime and ceftriaxone [5].

<sup>d</sup> *N. gonorrhoeae* H041 is considered highly resistant to ceftriaxone [6].

**Table S2:** Commensal *Neisseria* minimal inhibitory concentrations (MIC, µg/mL) to antibiotics (penicillin, azithromycin, ceftriaxone, erythromycin, chloramphenicol, gentamicin).

| MIC (µg/mL)                           | Penicillin | Ceftriaxone         | Azithromycin       | Erythromycin      | Chloramphenicol | Gentamicin |
|---------------------------------------|------------|---------------------|--------------------|-------------------|-----------------|------------|
| <i>N. lactamica</i>                   | 0.25       | 0.008               | 0.25               | 2                 | 0.5             | 2          |
| <i>N. cinerea</i>                     | 0.125-0.25 | 0.128               | 0.25-0.5           | 2                 | 0.5             | 2          |
| <i>N. mucosa</i>                      | 2          | 0.064               | 0.5                | 8                 | 4               | 2          |
| <i>N. elongata</i>                    | 0.5-1      | 0.064               | 0.5                | 4                 | 1               | 8          |
| <i>N. gonorrhoeae</i> FA19            |            |                     | 0.063 <sup>a</sup> | 0.25 <sup>a</sup> |                 | 4          |
| <i>N. gonorrhoeae</i> Su <sup>b</sup> | ≤ 0.06     | ≤ 0.015             | ≤ 0.5              | NA                | NA              | 4          |
| <i>N. gonorrhoeae</i> Re <sup>b</sup> | ≥ 2        | ≥ 0.25 <sup>c</sup> | ≥ 2 <sup>c</sup>   | NA                | NA              | 8          |

MIC values 16-fold or higher compared to susceptible *N. gonorrhoeae*'s values are highlighted in pink, while values 4-8 fold higher are highlighted in yellow.

<sup>a</sup> *N. gonorrhoeae* FA19 values according to Zarantonelli *et al.* [7].

<sup>b</sup> *N. gonorrhoeae*'s MIC breakpoint (µg/mL) values according to CLSI [8].

<sup>c</sup> *N. gonorrhoeae*'s MIC values of wild-type distribution according to Kirkcaldy *et al.* [9].

**Table S3:** Known mutations confirmed or likely involved in antimicrobial resistance, with observed cognate mutations in commensal *Neisseria*

| Antibiotic class | Antibiotic                 | gene | Known Mutation <sup>a</sup> | Observed Cognate Mutation in commensal <i>Neisseria</i> | Proportion present | Reference |
|------------------|----------------------------|------|-----------------------------|---------------------------------------------------------|--------------------|-----------|
| Macrolide        | Azithromycin, Erythromycin | rplV | I4L                         |                                                         | 0                  | [10]      |
| Macrolide        | Azithromycin, Erythromycin | rplV | L6Q                         | L6Q                                                     | 9/11               | [10]      |
| Macrolide        | Azithromycin, Erythromycin | rplV | K6Q                         |                                                         | 0                  | [10]      |
| Macrolide        | Azithromycin, Erythromycin | rplV | T72A                        | T72V                                                    | 11/11              | [10]      |
| Macrolide        | Azithromycin, Erythromycin | rplV | S101T                       | S101C                                                   | 11/11              | [10]      |
| Macrolide        | Azithromycin, Erythromycin | rplV | I103L                       |                                                         | 0                  | [10]      |
| Macrolide        | Azithromycin, Erythromycin | rplV | K83N                        |                                                         | 0                  | [10]      |
| Macrolide        | Azithromycin, Erythromycin | rplV | D94H                        | D94N                                                    | 11/11              | [10]      |
| Macrolide        | Azithromycin, Erythromycin | rplV | K98N                        | R99Q                                                    | 11/11              | [10]      |
| Macrolide        | Azithromycin, Erythromycin | rplV | V17I                        | V17A                                                    | 11/11              | [10]      |
| Macrolide        | Azithromycin, Erythromycin | rplV | L46Q                        | V45Q                                                    | 11/11              | [10]      |
| Macrolide        | Azithromycin, Erythromycin | rplD | V52I                        |                                                         | 0                  | [10]      |
| Macrolide        | Azithromycin, Erythromycin | rplD | V52L                        |                                                         | 0                  | [10]      |
| Macrolide        | Azithromycin, Erythromycin | rplD | A37S                        |                                                         | 0                  | [10]      |
| Macrolide        | Azithromycin, Erythromycin | rplD | K74T                        | K74S                                                    | 26/26              | [10]      |
| Macrolide        | Azithromycin, Erythromycin | rplD | D91E                        | D91N                                                    | 26/26              | [10]      |
| Macrolide        | Azithromycin, Erythromycin | rplD | V120I                       | V120A                                                   | 9/26               | [10]      |
| Macrolide        | Azithromycin, Erythromycin | rplD | V120I                       | V121I                                                   | 10/26              | [10]      |
| Macrolide        | Azithromycin, Erythromycin | rplD | K123S                       | K123A                                                   | 14/26              | [10]      |
| Macrolide        | Azithromycin, Erythromycin | rplD | K123S                       | K123S                                                   | 1/26               | [10]      |
| Macrolide        | Azithromycin, Erythromycin | rplD | K123S                       | K123D                                                   | 1/26               | [10]      |
| Macrolide        | Azithromycin, Erythromycin | rplD | K123S                       | K123E                                                   | 14/26              | [10]      |

|                                |                                              |      |                     |              |       |      |
|--------------------------------|----------------------------------------------|------|---------------------|--------------|-------|------|
| Macrolide                      | Azithromycin,<br>Erythromycin                | rplD | D154E               |              | 0     | [10] |
| Macrolide                      | Azithromycin,<br>Erythromycin                | rplD | T173N               | T173Q        | 16/26 | [10] |
| Macrolide                      | Azithromycin,<br>Erythromycin                | rplD | T173N               | T173H        | 9/26  | [10] |
| Macrolide                      | Azithromycin,<br>Erythromycin                | rplD | A190V               | A190K        | 13/26 | [10] |
| Macrolide                      | Azithromycin,<br>Erythromycin                | rplD | A190V               | A190R        | 8/27  | [10] |
| Macrolide                      | Azithromycin,<br>Erythromycin                | mtrR | A39T                |              |       | [11] |
| Macrolide                      | Azithromycin,<br>Erythromycin                | mtrR | G45D                |              |       | [11] |
| Beta-lactams/<br>Cephalosporin | Penicillin, Ampicillin,<br>Ceftriaxone       | penA | F504L               |              |       | [11] |
| Beta-lactams/<br>Cephalosporin | Penicillin, Ampicillin,<br>Ceftriaxone       | penA | A510V               |              |       | [11] |
| Beta-lactams/<br>Cephalosporin | Penicillin, Ampicillin,<br>Ceftriaxone       | penA | A516G               |              |       | [11] |
| Beta-lactams/<br>Cephalosporin | Penicillin, Ampicillin,<br>Ceftriaxone       | penA | P551L               |              |       | [11] |
| Beta-lactams/<br>Cephalosporin | Penicillin, Ampicillin,<br>Ceftriaxone       | penA | I312M               |              |       | [11] |
| Beta-lactams/<br>Cephalosporin | Penicillin, Ampicillin,<br>Ceftriaxone       | penA | V316T               |              |       | [11] |
| Beta-lactams/<br>Cephalosporin | Penicillin, Ampicillin,<br>Ceftriaxone       | ponA | L421P               |              |       | [11] |
| Beta-lactams/<br>Cephalosporin | Penicillin, Ampicillin,<br>Ceftriaxone       | porB | G120K               |              | 0     | [11] |
| Tetracycline                   | Tetracycline                                 | rpsJ | V57M                |              | 0     |      |
| Tetracycline                   | Tetracycline                                 | tetM | plasmid<br>mediated | Not observed | 0     |      |
| Chloramphenicol                | Chloramphenicol                              | CAT  | plasmid<br>mediated | Not observed | 0     |      |
| Aminoglycoside                 | Streptomycin,<br>Spectinomycin,<br>Kanamycin | str  |                     | Not observed | 0     |      |
| Aminoglycoside                 | Gentamicin                                   | N/A  |                     | Not observed | 0     |      |

<sup>a</sup> Known mutations may have been identified in *N. gonorrhoeae* or in other model organisms such as *Escherichia coli*.

## References:

1. Alonso, C.A.; Domínguez, C.; Heras, J.; Mata, E.; Pascual, V.; Torres, C.; Zarazaga, M. Antibigramj: A tool for analysing images from disk diffusion tests. *Computer Methods and Programs in Biomedicine* **2017**, *143*, 159-169, doi:10.1016/j.cmpb.2017.03.010.
2. Schneider, C.A.; Rasband, W.S.; Eliceiri, K.W. NIH Image to ImageJ: 25 years of image analysis. *Nat Methods* **2012**, *9*, 671-675, doi:10.1038/nmeth.2089.
3. McKenna, W.R.; Mickelsen, P.A.; Sparling, P.F.; Dyer, D.W. Iron uptake from lactoferrin and transferrin by *Neisseria gonorrhoeae*. *Infect Immun* **1988**, *56*, 785-791, doi:10.1128/IAI.56.4.785-791.1988.
4. Swanson, J.; Barrera, O.; Sola, J.; Boslego, J. Expression of outer membrane protein II by gonococci in experimental gonorrhea. *J Exp Med* **1988**, *168*, 2121-2129, doi:10.1084/jem.168.6.2121.
5. Unemo, M.; Golparian, D.; Nicholas, R.; Ohnishi, M.; Gallay, A.; Sednaoui, P. High-level cefixime- and ceftriaxone-resistant *Neisseria gonorrhoeae* in France: novel *penA* mosaic allele in a successful international clone causes treatment failure. *Antimicrob Agents Chemother* **2012**, *56*, 1273-1280, doi:10.1128/AAC.05760-11.
6. Ohnishi, M.; Golparian, D.; Shimuta, K.; Saika, T.; Hoshina, S.; Iwasaku, K.; Nakayama, S.; Kitawaki, J.; Unemo, M. Is *Neisseria gonorrhoeae* initiating a future era of untreatable gonorrhea?: detailed characterization of the first strain with high-level resistance to ceftriaxone. *Antimicrob Agents Chemother* **2011**, *55*, 3538-3545, doi:10.1128/AAC.00325-11.
7. Zarantonelli, L.; Borthagaray, G.; Lee, E.H.; Veal, W.; Shafer, W.M. Decreased susceptibility to azithromycin and erythromycin mediated by a novel *mtrR* promoter mutation in *Neisseria gonorrhoeae*. *J Antimicrob Chemother* **2001**, *47*, 651-654.
8. Clinical and Laboratory Standards Institute. Performance Standards for Antimicrobial Susceptibility Testing; Twenty-Third Informational Supplement. **2013**.
9. Kirkcaldy, R.D.; Harvey, A.; Papp, J.R.; Del Rio, C.; Soge, O.O.; Holmes, K.K.; Hook, E.W., 3rd; Kubin, G.; Riedel, S.; Zenilman, J.; et al. *Neisseria gonorrhoeae* Antimicrobial Susceptibility Surveillance - The Gonococcal Isolate Surveillance Project, 27 Sites, United States, 2014. *MMWR Surveill Summ* **2016**, *65*, 1-19, doi:10.15585/mmwr.ss6507a1.
10. Fiore, M.A.; Raisman, J.C.; Wong, N.H.; Hudson, A.O.; Wadsworth, C.B. Exploration of the *Neisseria* Resistome Reveals Resistance Mechanisms in Commensals That May Be Acquired by *N. gonorrhoeae* through Horizontal Gene Transfer. *Antibiotics (Basel)* **2020**, *9*, doi:10.3390/antibiotics9100656.
11. Liao, M.; Gu, W.M.; Yang, Y.; Dillon, J.A. Analysis of mutations in multiple loci of *Neisseria gonorrhoeae* isolates reveals effects of PIB, PBP2 and MtrR on reduced susceptibility to ceftriaxone. *J Antimicrob Chemother* **2011**, *66*, 1016-1023, doi:10.1093/jac/dkr021.
